# Supplementary material for: Highly sensitive voltammetric determination of hydrochlorothiazide using a glassy carbon electrode modified with Super P carbon black nanoparticles
Source: Royal Society of Chemistry journal article supplement (doi:10.1039/d4ay00900b), 2024-01-01
Supplement: d4ay00900b1.pdf [file d4ay00900b1.pdf]

## Supporting Information

### **Highly sensitive voltammetric determination of hydrochlorothiazide using a glassy carbon electrode modified with super P carbon black nanoparticles**

Domingos R. Santos-Neto<sup>1</sup>, Carlos E. C. Lopes<sup>2</sup>, Gabrielly P. Silva<sup>1</sup>, Lizandra N. Castro<sup>1</sup>,  
João P. C. Silva<sup>2</sup>, Dianderson C. M. Ferreira<sup>2</sup>, Luiz Ricardo G. Silva<sup>2</sup>, Luiza M. F. Dantas<sup>1,2</sup>,  
Iranaldo S. da Silva<sup>1,2\*</sup>

<sup>1</sup>*Chemistry Technology Department, Federal University of Maranhão, 65080-805, São Luís, Maranhão, Brazil.*

<sup>2</sup>*Postgraduate Program in Chemistry, Federal University of Maranhão, 65080-805, São Luís, Maranhão, Brazil*

#### **Corresponding author:**

e-mail: \*iranaldo.ss@ufma.br ORCID: 0000-0001-6216-9141

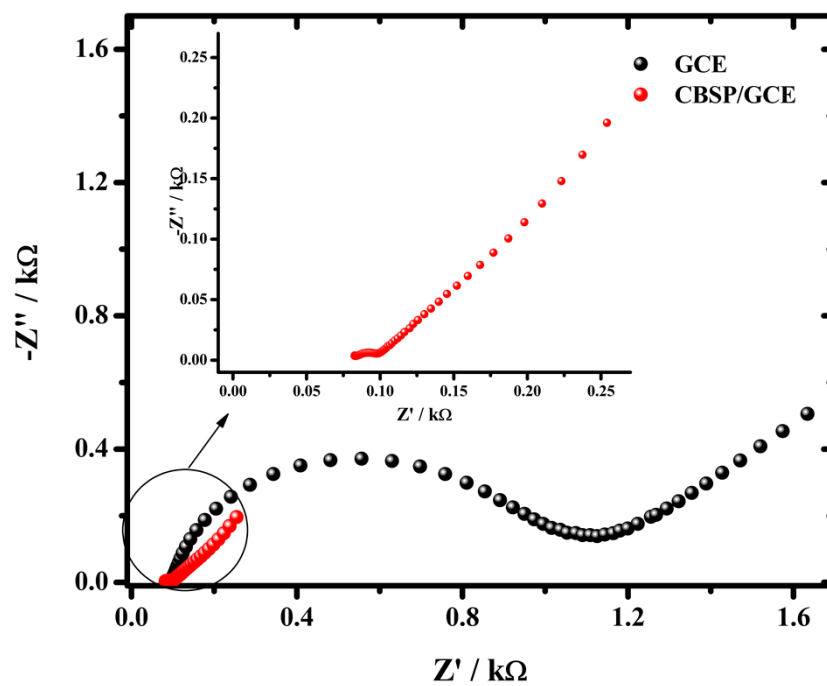

**Fig. S1.** Nyquist diagram for GCE and SPCB/GCE in  $0.1 \text{ mol L}^{-1}$  KCl in the presence of  $5.0 \text{ mmol L}^{-1}$   $[\text{Fe}(\text{CN})_6]^{-3}$ .

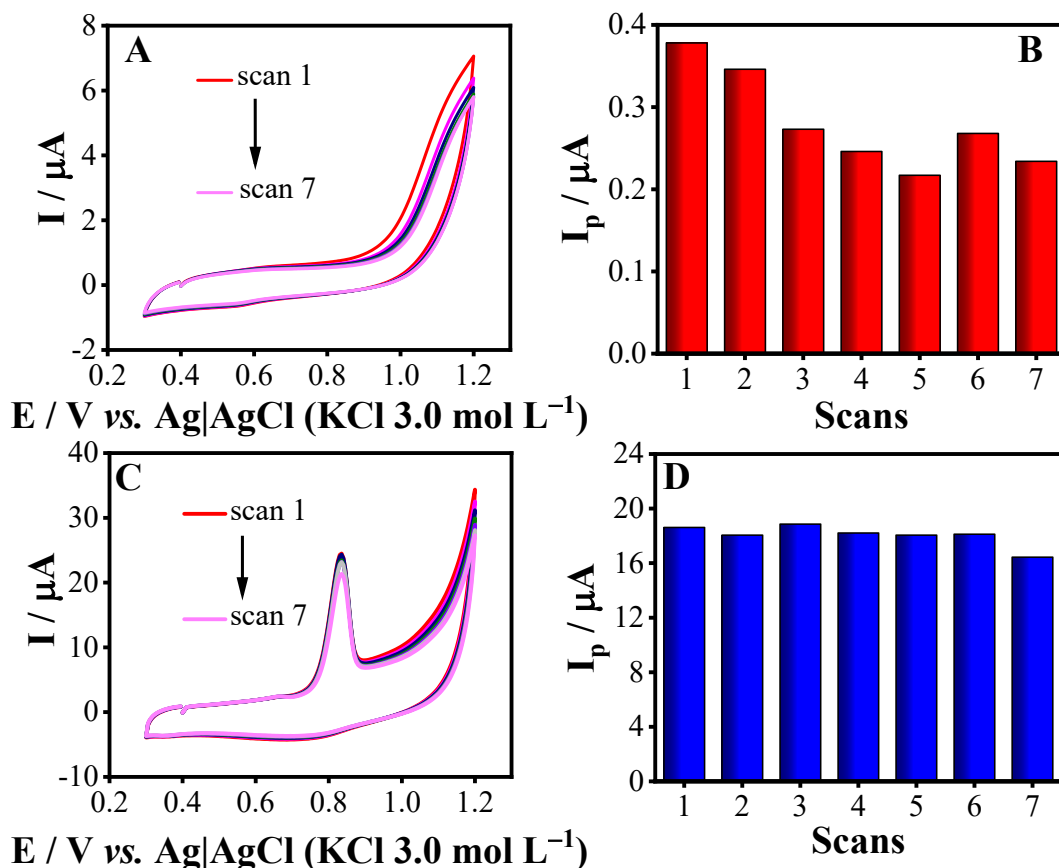

**Fig. S2.** Cyclic Voltammograms and peak currents obtained in the presence of HCT (0.20 mmol L<sup>-1</sup>) with (A and B) GCE and (C and D) SPCB/GCE and obtained. Measurement parameters: B-R buffer pH=7.0 as supporting electrolyte.  $\nu = 50 \text{ mV s}^{-1}$ .  $E_{\text{step}} = 5 \text{ mV}$ .

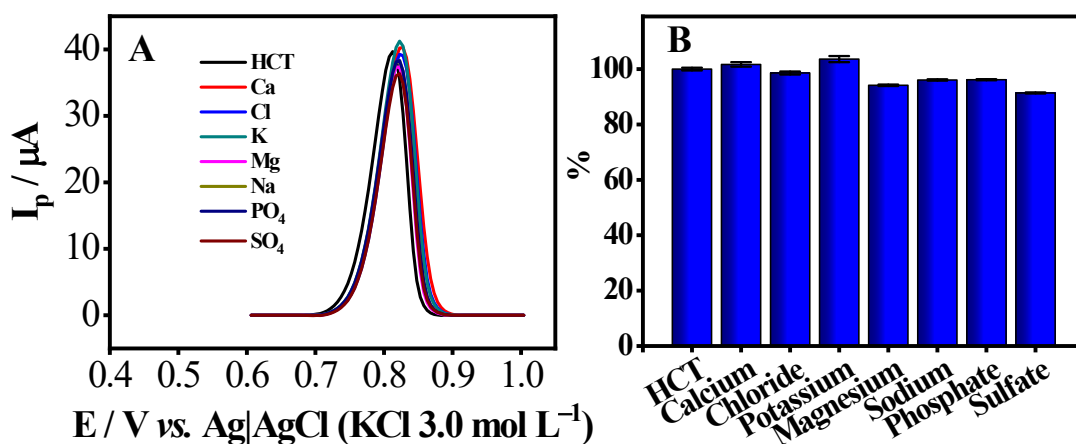

**Fig. S3.** (A) LSAdSVs and (B) standardized peak current values obtained during HCT measurements in the presence of a variety of possible interferents (Ca<sup>2+</sup>, Cl<sup>-</sup>, K<sup>+</sup>, Mg<sup>2+</sup>, Na<sup>+</sup>, PO<sub>4</sub><sup>2-</sup>, SO<sub>4</sub><sup>2-</sup>). Measurement parameters: B-R buffer pH=7.0 as supporting electrolyte.  $\nu = 50 \text{ mV s}^{-1}$ .  $E_{\text{step}} = 5 \text{ mV}$ .

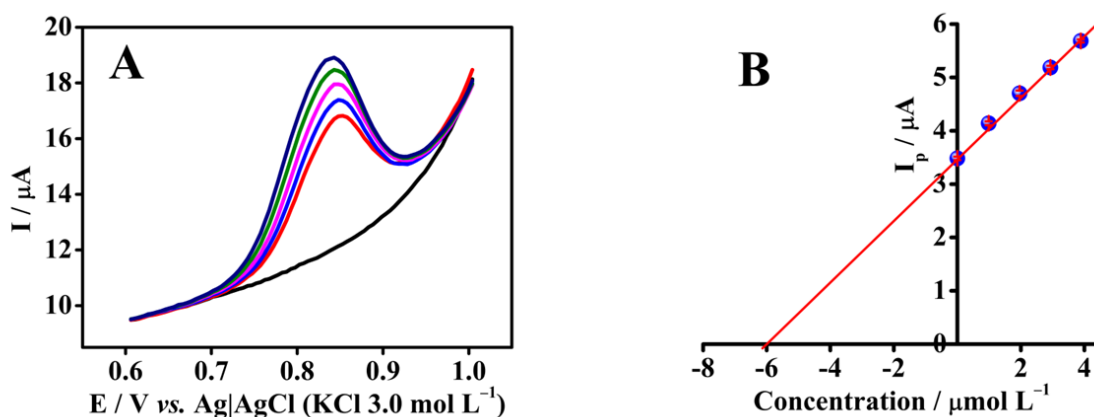

**Fig. S4.** (A) Linear Sweep Voltammograms obtained with SPCB/GCE during consecutive additions of HCT (1.0; 2.0; 3.0; 4.0  $\mu\text{mol L}^{-1}$ ) in the tablet A analysis. (B) Relationship between peak current in function of the concentration.

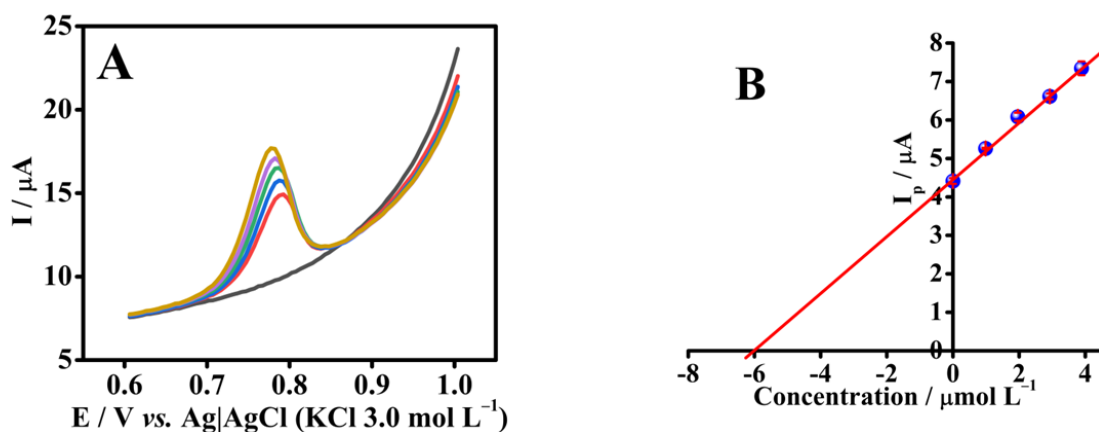

**Fig. S5.** (A) Linear Sweep Voltammograms obtained with SPCB/GCE during consecutive additions of HCT (1.0; 2.0; 3.0; 4.0  $\mu\text{mol L}^{-1}$ ) in the tablet B analysis. (B) Relationship between peak current in function of the concentration.

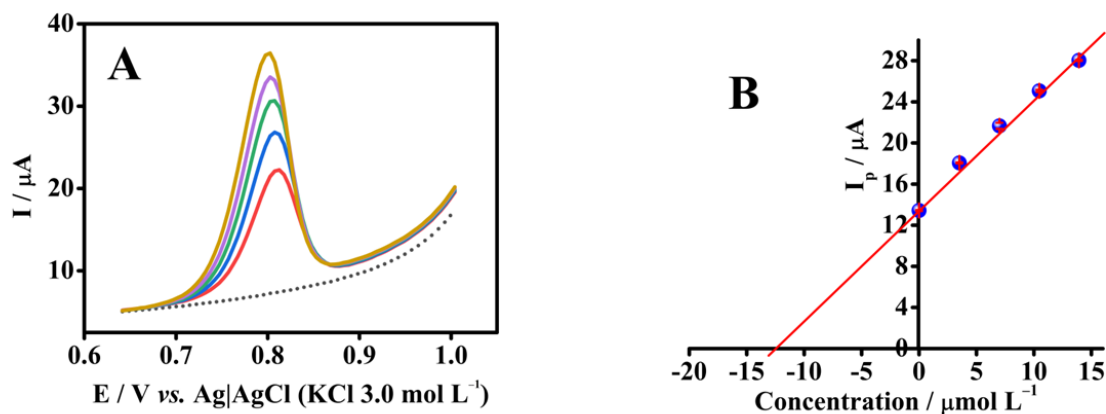

**Fig. S6.** (A) Linear Sweep Voltammograms obtained with SPCB/GCE during consecutive additions of HCT (5.0; 7.5; 10.0; 12.5  $\mu\text{mol L}^{-1}$ ) in the spiked tea A analysis. (B) Relationship between peak current in function of the concentration.

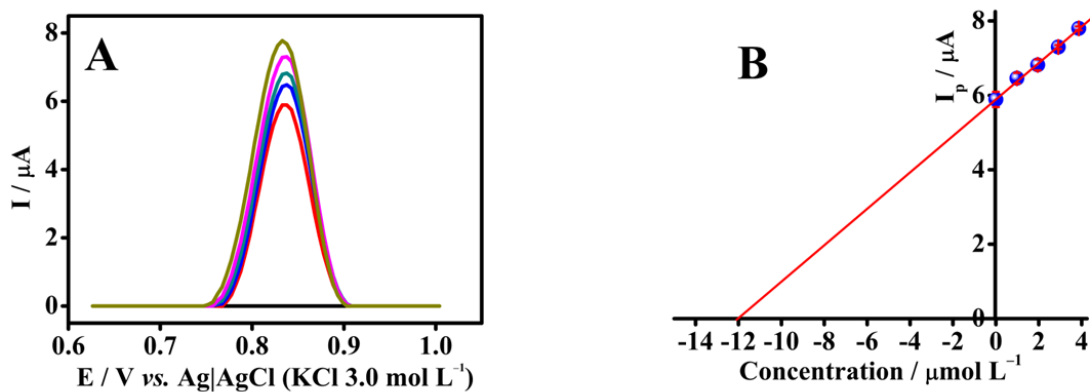

**Fig. S7.** (A) Linear Sweep Voltammograms obtained with SPCB/GCE during consecutive additions of HCT (1.0; 2.0; 3.0; 4.0  $\mu\text{mol L}^{-1}$ ) in the spiked tea B analysis. (B) Relationship between peak current in function of the concentration.

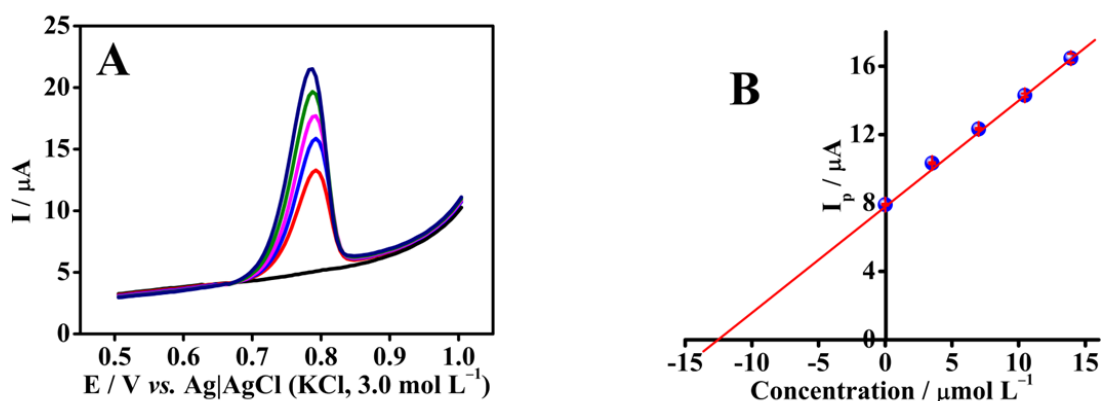

**Fig. S8.** (A) Linear Sweep Voltammograms obtained with SPCB/GCE during consecutive additions of HCT (5.0; 7.5; 10.0; 12.5  $\mu\text{mol L}^{-1}$ ) in the spiked tap water analysis. (B) Relationship between peak current in function of the concentration.

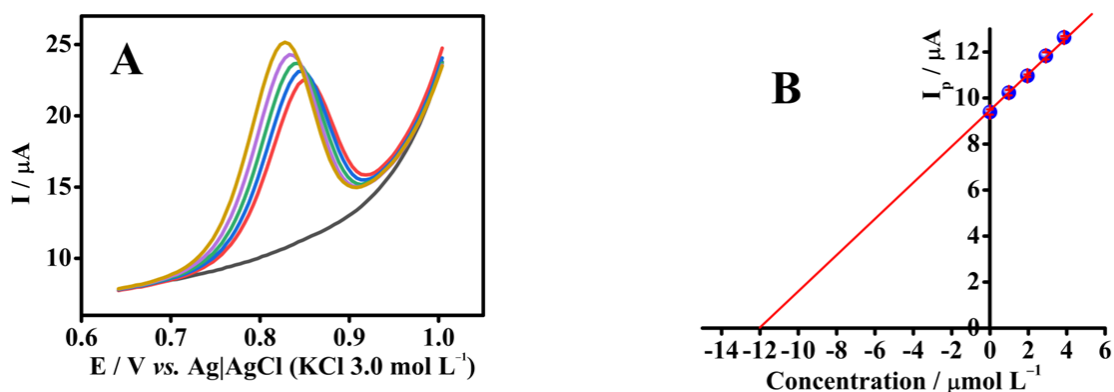

**Fig. S9.** (A) Linear Sweep Voltammograms obtained with SPCB/GCE during consecutive additions of HCT (1.0; 2.0; 3.0; 4.0  $\mu\text{mol L}^{-1}$ ) in the spiked lake water analysis. (B) Relationship between peak current in function of the concentration.

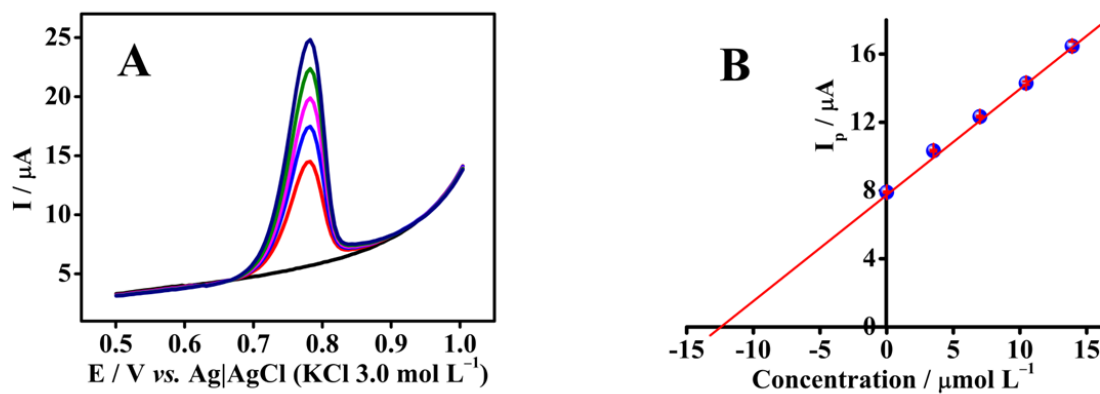

**Fig. S10.** (A) Linear Sweep Voltammograms obtained with SPCB/GCE during consecutive additions of HCT (5.0; 7.5; 10.0; 12.5  $\mu\text{mol L}^{-1}$ ) in the spiked synthetic urine analysis. (B) Relationship between peak current in function of the concentration.
